# Supplementary material for: Assessment of Renal Risk Score and Histopathological Classification for Prediction of End-Stage Kidney Disease and Factors Associated With Change in eGFR After ANCA-Glomerulonephritis Diagnosis
Source: Frontiers journal article supplement (doi:10.3389/fimmu.2022.834878), 2022-03-22

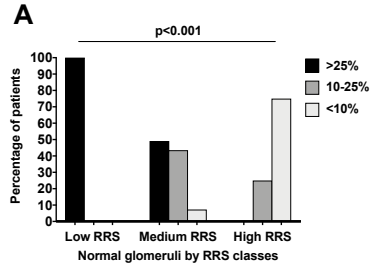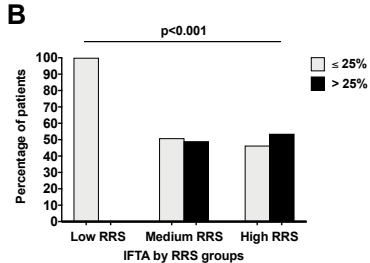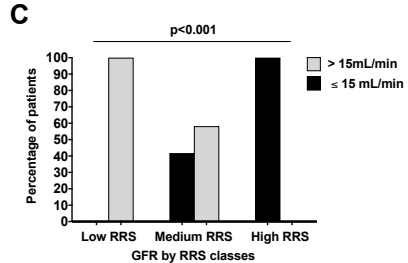

Supplement: Data_Sheet_2.PDF [file Data_Sheet_2.PDF]
